# Supplementary material
Source: ML conference proceedings conference paper supplement (https://openreview.net/forum?id=TW99HrZCJU)
Supplement: supplementary_material [file attachment]

## A Appendix

### A.1 Additional Discussion on Imbalanced Datasets

We consider imbalanced datasets that mixes the trajectories logged by high- and low- performing behavior policies, where trajectories from low-performing behavior policies predominate the dataset. When dealing with such imbalanced datasets, the regularized offline RL objective (Equation 2) tends to constrain the learned policy  $\pi$  to stay close to the overall mediocre behavior policy rather than the high-performing one, which is an unnecessary form of conservativeness. We illustrate this issue from intuitive and analytical aspects in the following.

Intuitively, for example, when considering a dataset  $\mathcal{D}$  that mix the trajectories from two behavior policies  $\pi_D^H$  and  $\pi_D^L$  where  $\pi_D^H$  significantly outperforms  $\pi_D^L$  (i.e.,  $J(\pi_D^H) \geq J(\pi_D^L)$ ), if the dataset is imbalanced such that state-action pairs  $(s_t, a_t)$  logged by  $\pi_D^L$  predominate, the regularized offline RL objective will penalize deviation from  $\pi_D^L$  more than deviation from  $\pi_D^H$ . This is because uniform sampling on the imbalanced dataset oversamples state-action pairs  $(s_t, a_t)$  from  $\pi_D^L$ , leading to an over-weighting of the regularization term on those state-action pairs  $(s_t, a_t)$ .

Analytically, the issue of unnecessary conservativeness (Section 3) can be explained by how the performance of offline RL  $J(\pi)$  is dependent on the performance of the behavior policy  $J(\pi_D)$ , as suggested in [13]. In the case of an imbalanced dataset where the behavior policy can be regarded a mixture of  $\pi_D^H$  and  $\pi_D^L$ , the performance of the behavior policy  $J(\pi_D)$  can be estimated by the expected return of the distribution of trajectory in the dataset  $\mathcal{D}$ , as shown below:

$$J(\pi_D) \approx \mathbb{E}_{\tau_i \sim \mathcal{D}} [G(\tau_i)] = \sum_{i=1}^N \mathcal{D}(\tau_i) G(\tau_i), \quad (16)$$

where  $\mathcal{D}(\tau_i)$  denotes the probability mass of trajectory  $\tau_i$  in  $\mathcal{D}$ ,  $G(\tau_i) := \sum_{t=0}^{T_i-1} r(s_t^i, a_t^i)$  is the return (i.e., sum of rewards) of trajectory  $\tau_i$ , and  $T_i$  is its length. Since the trajectories from  $\pi_D^L$  dominate the dataset, the average return is mostly determined by low-return trajectories, leading to low  $J(\pi_D)$ . This prevents pessimistic and conservative algorithms [22, 8, 19, 21, 26] from achieving high  $J(\pi)$  with low  $J(\pi_D)$ . Both types of algorithms aim to learn a policy  $\pi$  that outperforms  $\pi_D$  (i.e.,  $J(\pi) \geq J(\pi_D)$ ), while constraining the policy  $\pi$  to stay close to  $\pi_D$  [4]. Recent theoretical analysis by Singh et al. [39] on conservative Q-learning (CQL) [22] (an offline RL algorithm) shows that the performance improvements of the learned policy  $\pi$  over the behavior policy is upper-bounded by the deviation of  $\pi$  from  $\pi_D$  as shown in:  $J(\pi) - J(\pi_D) \leq C \mathbb{E}_{(s,a) \sim \mathcal{D}} [\mathcal{C}(s,a)]$ , where  $C$  is a constant and  $\mathcal{C}$  denotes the regularization penalty (see Section 2). This implies that regularized objective would constrain the policy  $\pi$  from deviating from  $\pi_D$ , thus corroborating the findings in [13] despite the absence general theoretical guarantees for all offline RL algorithms.

**Why our method improves performance on imbalanced datasets?** Our importance reweighting method can be seen as a modification of the performance of the behavior policy, which represents the lower bound in conservative and pessimistic offline RL algorithms. By adjusting the weights of state-action pairs sampled from the dataset, we simulate the sampling of data from an alternative dataset  $\mathcal{D}_w$  that would be generated by an alternative behavior policy  $\pi_{\mathcal{D}_w}$ . By maximizing the expected return  $J(\pi_{\mathcal{D}_w})$  of this alternative behavior policy  $\pi_{\mathcal{D}_w}$ , we can obtain a  $\pi_{\mathcal{D}_w}$  that outperforms the original behavior policy  $\pi_D$ , i.e.,  $J(\pi_{\mathcal{D}_w}) \geq J(\pi_D)$ . As mentioned earlier, most offline RL algorithms aim to achieve a policy that performs at least as well as the behavior policy that collected the dataset. By training an offline RL algorithm using a dataset  $\mathcal{D}_w$  induced by reweighting with  $w$ , we obtain a higher lower bound on the policy's performance, as  $J(\pi_{\mathcal{D}_w}) \geq J(\pi_D)$ .

### A.2 Implementation details

#### A.2.1 Offline RL algorithms

We implement our method and other baselines on top of two offline RL algorithms: Conservative Q-Learning (CQL) [22] and Implicit Q-Learning (IQL) [19]. Our baselines, advantage-filtering (AW) and percentage-filtering (PF), are weighted-sampling methods (see Section 5.1). Therefore, they do not require changing the implementation of offline RL algorithms. In the following sections, we explain the details of our importance weighting method for each algorithm.

541 **CQL.** We reweight both the actor (policy) and the critic (Q-function) in CQL as follows:

$$\max_{\pi} \mathbb{E}_{s \sim \mathcal{D}, a \sim \pi(\cdot|s)} [w_{\phi}(s) (Q(s, a) - \log \pi(a|s))] \quad (\text{Actor}) \quad (17)$$

$$\min_Q \alpha \mathbb{E}_{(s,a) \sim \mathcal{D}} \left[ w_{\phi,\psi}(s, a) \left( \log \sum_{a' \in \mathcal{A}} \exp Q(s, a') - Q(s, a) \right) \right] + \quad (\text{Critic}) \quad (18)$$

$$\mathbb{E}_{(s,a,s') \sim \mathcal{D}, a' \sim \pi(\cdot|s')} [w_{\phi,\psi}(s, a) (r(s, a) + \gamma Q(s', a') - Q(s, a))^2]$$

$$\min_{\alpha} \mathbb{E}_{s \sim \mathcal{D}, a \sim \pi(\cdot|s)} [w_{\phi}(s) (-\log \pi(a|s) - \bar{\mathcal{H}})] \quad (\text{Entropy coefficient [12]}), \quad (19)$$

542 where  $\bar{\mathcal{H}}$  denotes the target entropy used in soft actor critic (SAC) [12] and  $w_{\phi}$  and  $w_{\phi,\psi}$  denote  
 543 the weights predicted by our method (see Section 4). We follow the notations in CQL paper [22].  
 544 The implementation details of computing Equation 17 can be found in [22]. Our implementation is  
 545 adapted from open-sourced implementation: JaxCQL<sup>3</sup>.

546 **IQL.** We reweight state-value function ( $V$ ), state-action value function (i.e., Q-function,  $Q$ ), and  
 547 policy ( $\pi$ ) in IQL as follows:

$$\min_V \mathbb{E}_{(s,a) \sim \mathcal{D}} [w_{\phi}(s) L_2^T(Q(s, a) - V(s))] \quad (20)$$

$$\min_Q \mathbb{E}_{(s,a,s') \sim \mathcal{D}} [w_{\phi,\psi}(s, a) (r(s, a) + \gamma V(s') - V(s))^2] \quad (21)$$

$$\max_{\pi} \mathbb{E}_{(s,a) \sim \mathcal{D}} [w_{\phi,\psi}(s, a) \exp(\beta (Q(s, a) - V(s)) \log \pi(a|s))], \quad (22)$$

548 where  $L_2^T$  denotes the upper expectile loss [19] and  $\beta$  denotes the temperature parameter for IQL.  
 549 Our implementation is adapted from the official implementation<sup>4</sup> for implicit Q-learning (IQL) [19].

550 We attach our implementation in the supplementary material, where CQL and IQL implementations  
 551 are in JaxCQL and implicit\_q\_learning, respectively.

## 552 A.2.2 Density-weighting function

553 The following is the training objective of the importance weighting function  $w_{\phi,\psi}$  and  $w_{\phi}$  in our  
 554 method, as described in Equation 10 (Section 4.2):

$$\max_{\phi,\psi} \mathbb{E}_{(s,a,s') \sim \mathcal{D}} \left[ \underbrace{w_{\phi,\psi}(s, a) r(s, a)}_{\text{Return}} - \lambda_F \underbrace{(w_{\phi}(s') - w_{\phi,\psi}(s, a))^2}_{\text{Bellman flow conservation penalty}} \right] - \lambda_K \underbrace{D_{KL}(\mathcal{D}_w || \mathcal{D})}_{\text{KL regularization}}.$$

555 The KL regularization term can be expressed as follows:

$$\begin{aligned} D_{KL}(\mathcal{D}_w || \mathcal{D}) &= \sum_{s,a} \mathcal{D}_w(s, a) \log \frac{\mathcal{D}_w(s, a)}{\mathcal{D}(s, a)} \\ &= \sum_{s,a} \mathcal{D}(s, a) \frac{\mathcal{D}_w(s, a)}{\mathcal{D}(s, a)} \log \frac{\mathcal{D}_w(s, a)}{\mathcal{D}(s, a)} \\ &= \mathbb{E}_{(s,a) \sim \mathcal{D}} \left[ \frac{\mathcal{D}_w(s, a)}{\mathcal{D}(s, a)} \log \frac{\mathcal{D}_w(s, a)}{\mathcal{D}(s, a)} \right] \\ &= \mathbb{E}_{(s,a) \sim \mathcal{D}} [w(s, a) \log w(s, a)]. \end{aligned} \quad (23)$$

556 Thus, we can rewrite the training objective (Equation 10) to the follows:

$$\max_{\phi,\psi} \mathbb{E}_{(s,a,s') \sim \mathcal{D}} \left[ \underbrace{w_{\phi,\psi}(s, a) r(s, a)}_{\text{Return}} - \lambda_F \underbrace{(w_{\phi}(s') - w_{\phi,\psi}(s, a))^2}_{\text{Bellman flow conservation penalty}} - \lambda_K \underbrace{w_{\phi,\psi}(s, a) \log w_{\phi,\psi}(s, a)}_{\text{KL regularization}} \right]. \quad (24)$$

<sup>3</sup><https://github.com/young-geng/JaxCQL>

<sup>4</sup>[https://github.com/ikostrikov/implicit\\_q\\_learning](https://github.com/ikostrikov/implicit_q_learning)

557 The objective in Equation 24 can be optimized by minimizing the loss function  $L(\phi, \psi)$  using  
 558 stochastic gradient descent shown below:

$$L(\phi, \psi) := L_R(\phi, \psi) + \lambda_F L_F(\phi, \psi) + \lambda_K L_K(\phi, \psi) \quad (25)$$

$$L_R(\phi, \psi) := - \sum_{i=1}^B \bar{w}_{\phi, \psi}(s_i, a_i) r(s_i, a_i) \quad (26)$$

$$L_F(\phi, \psi) := \frac{1}{B} \sum_{i=1}^B (w_{\phi, \psi}(s'_i) - w_{\phi, \psi}(s_i, a_i))^2. \quad (27)$$

$$L_K(\phi, \psi) := \sum_{i=1}^B \bar{w}_{\phi, \psi}(s, a) \log \bar{w}_{\phi, \psi}(s, a), \quad (28)$$

559 where  $B$  denote batch size and  $(s_i, a_i)$  denotes the  $i^{\text{th}}$  state-action pair in the batch.  $\bar{w}_{\phi, \psi}(s_i, a_i)$   
 560 denotes the batch normalized weights predictions [32] that is defined as follows:

$$\bar{w}_{\phi, \psi}(s_i, a_i) := \frac{w_{\phi, \psi}(s_i, a_i)}{\sum_{j=1}^B w_{\phi, \psi}(s_j, a_j)}, \quad (29)$$

561 where  $w_{\phi, \psi}(s_i, a_i)$  denotes the importance weights predictions from the network  $\phi$  and  $\psi$  (see  
 562 Section 4.2). As [32] suggests, applying batch-level normalization on the importance weights  
 563 predictions can make the normalization requirement of importance weights, i.e.,  $\mathbb{E}[w] = 1$ , more  
 564 likely being satisfied during optimization than other approaches (e.g., adding normalization penalty  
 565 term) (see [32] for details).

### 566 A.3 Evaluation detail

#### 567 A.3.1 Training details

568 For both the baselines and our method, we train CQL and IQL for a total of one million gradient  
 569 steps. The hyperparameters used for CQL and IQL are set to the optimal values recommended in  
 570 their publicly available implementations. As for the training of our density weighting functions  $\phi, \psi$ ,  
 571 we employ the same network architecture as the Q-value function architectures in CQL and IQL,  
 572 which consists of a two-layer Multilayer Perceptron (MLP) with 256 neurons and ReLU activation  
 573 in each layer. To minimize the objective defined in Equation 25, we train  $\phi$  and  $\psi$  using the Adam  
 574 optimizer [17] with a learning rate of 0.0001 and a batch size of 256. In each gradient step of CQL  
 575 and IQL, we train  $\phi$  and  $\psi$  for one gradient step as well.

576 We conducted hyperparameter search in the datasets with diverse trajectories. For AW with CQL we  
 577 searched temperature  $\eta$ : 0.01 (L), 0.1 (M, the best from the original paper), 1.0 (H), 5.0 (XH). For AW  
 578 with IQL, we searched temperature  $\eta$ : 0.01 (L), 0.2 (M) (the best from the original paper), 1.0 (H),  
 579 5.0 (XH). For PF in CQL and IQL, we searched  $K$  over 0.1, 0.2, and 0.5. The hyperparameter search  
 580 results are all already presented in Figures 2a. For DW-AW, we use the temperature  $\eta$  used in AW-M  
 581 for CQL and IQL, except for small datasets. In small datasets (Figure 2b), we use the temperature  
 582 used in AW-XH for DW-AW. For DW-AW and DW-Uniform, we searched  $\lambda_K \in \{0.2, 1.0\}$  and  
 583  $\lambda_F \in \{0.1, 1.0, 5.0\}$ . We use the best found hyperparameter by the time we started the large scale  
 584 experiments:  $(\lambda_K, \lambda_F) = (0.2, 0.1)$  for CQL and  $(\lambda_K, \lambda_F) = (1.0, 1.0)$  for IQL. We present the  
 585 hyperparameter search results of DW-Uniform in Figure 2.

#### 586 A.3.2 Evaluation details

587 We follow the evaluation protocol used in most offline RL research [22, 8, 19]. Each offline RL  
 588 algorithm and sampling method (including our DW approach) combination is trained for one million  
 589 gradient steps with three random seeds in each dataset. We evaluate the policy learned by each  
 590 method in the environment corresponding to the dataset for 20 episodes every 1000 gradient step.  
 591 The main performance metric reported is the interquartile mean (IQM) [1] of the normalized mean  
 592 return over the last 10 rounds of evaluation across multiple datasets, along with its 95% confidence  
 593 interval calculated using the bootstrapping method. As suggested in [1], IQM is a robust measure  
 594 of central tendency by discarding the top and bottom 25% of samples, making it less sensitive to  
 595 outliers.

596 **Compute.** We ran all the experiments using workstations with two RTX 3090 GPUs, AMD Ryzen  
597 Threadripper PRO 3995WX 64-Cores CPU, and 256GB RAM.

### 598 A.3.3 Dataset curation.

599 Following the protocol in prior offline RL benchmarking [7, 13], we develop representative datasets  
600 for Scenarios (i) and (ii) using the locomotion tasks from the D4RL Gym suite.

601 **Scenario (i): Datasets with trajectories starting from similar initial states.** This type of datasets  
602 was proposed in [13], mixing trajectories gathered by high- and low-performing policies, as described  
603 in Section 3. Each trajectory is collected by rolling out a policy starting from similar initial states until  
604 reaching timelimit or terminal states. As suggested in [13], these datasets are generated by combining  
605  $1 - \sigma\%$  of trajectories from the random-v2 dataset (low-performing) and  $\sigma\%$  of trajectories from  
606 the medium-v2 or expert-v2 dataset (high-performing) for each locomotion environment in the  
607 D4RL benchmark. For instance, a dataset that combines  $1 - \sigma\%$  of random and  $\sigma\%$  of medium  
608 trajectories is denoted as random-medium- $\sigma\%$ . We evaluate our method and the baselines on these  
609 imbalanced datasets across four  $\sigma \in \{1, 5, 10, 50\}$ , four environments. We construct 32 of this type of  
610 datasets in all the combinations of  $\{\text{ant, halfcheetah, hopper, walker2d}\} \times \{\text{random-medium,}$   
611  $\text{random-expert}\} \times \{\sigma \in \{1, 5, 10, 50\}\}$ . Also, we consider a variant of smaller versions of these  
612 datasets that have small number of trajectories, where each dataset contains 50,000 state-action pairs,  
613 which is 20 times smaller. These smaller datasets can test if a method overfits to small amounts of  
614 data from high-performing policies. As every method fails to surpass random policy when  $\sigma = 1$   
615 and  $\sigma = 5$ , we only evaluate all the methods in  $\sigma = 10$ . Note that the results in  $\sigma = 50$  is not different  
616 from the results in larger version of mixed dataset with  $\sigma = 50$  since the amount of high-performing  
617 trajectories is still sufficient when  $\sigma = 50$ .

618 **Scenario (ii): Datasets with trajectories starting from diverse initial states.** Trajectories in this  
619 type of dataset start from a wider range of initial states and have varying lengths. This characteristic  
620 is designed to simulate scenarios where trajectories from different parts of a task are available in  
621 the dataset. One real-world example of this type of dataset is a collection of driving behaviors  
622 obtained from a fleet of self-driving cars. The dataset might encompass partial trajectories capturing  
623 diverse driving behaviors, such as merging onto a highway, changing lanes, navigating through  
624 intersections, and parking, although not every trajectory accomplishes the desired driving task of  
625 going from one specific location to the other. As not all kinds of driving behaviors occur with  
626 equal frequency, such a dataset is likely to be imbalanced, with certain driving behaviors being  
627 underrepresented. We curate this type of datasets by adapting the datasets from Scenario (i). These  
628 datasets are created by combining  $1 - \sigma\%$  of trajectory segments from the random-v2 dataset  
629 (representing low-performing policies) and  $\sigma\%$  of trajectory segments from either the medium-v2  
630 or expert-v2 dataset (representing high-performing policies) for each locomotion environment in  
631 the D4RL benchmark. Each trajectory segment is a subsequence of a trajectory in the dataset of  
632 Scenario (i). Specifically, for each trajectory  $\tau_i$ , a trajectory segment is selected, ranging in length  
633 from 10 to 50 timesteps within  $\tau_i$ . We chose the minimum and maximum lengths to be 10 and 50  
634 timesteps, respectively, based on our observation that most locomotion behaviors exhibit intervals  
635 lasting between 10 and 50 timesteps. Since locomotion behaviors are periodic in nature, these  
636 datasets can simulate locomotion recordings from various initial conditions, such as different poses  
637 and velocities.

638 The datasets in Scenario (ii) capture a different form of imbalance that is overlooked in the datasets  
639 of Scenario (i). The imbalanced datasets in Scenario (i) combine full trajectories from low- and  
640 high-performing policies, starting from similar initial states. These datasets capture the imbalance  
641 resulting from the policies themselves, while overlooking the imbalance caused by different initial  
642 conditions. Even when using the same behavior policy, the initial conditions, i.e., the initial states of  
643 trajectories, can lead to an imbalance in the dataset, as certain initial conditions tend to yield higher  
644 returns compared to others. For example, an agent starting near the goal and another starting far away  
645 from the goal may achieve significantly different returns, even when following the same policy. This  
646 type of imbalance can exist in real-world datasets if certain initial conditions are oversampled during  
647 the dataset collection process.

648 Figure 4 presents the distribution of normalized returns for both types of datasets in both scenarios.  
649 The trajectory returns are normalized to a range of 0 to 1 using max-min normalization, specifically

650  $(G(\tau_i) - G_{\min}) / (G_{\max} - G_{\min})$ , where  $G_{\min}$  and  $G_{\max}$  denote the minimum and maximum trajectory  
 651 returns in the dataset, respectively. From Figure 4, we observe that the two types of datasets exhibit  
 652 different return distributions. The return distribution in Scenario (i) (i.e., mixed) is closer to a bimodal  
 653 distribution, where a trajectory is either from a high- or low-performing policy. On the other hand,  
 654 the return distribution in Scenario (ii) (i.e., mixed (diverse)) follows a heavy-tailed distribution, where  
 655 high-return trajectories are located in the long tails. This indicates that in addition to the imbalance  
 656 resulting from the combination of trajectories from low- and high-performing policies, the presence  
 657 of diverse initial states introduces another type of imbalance in the dataset, where initial states that  
 658 easily lead to high returns are much less prevalent than others.

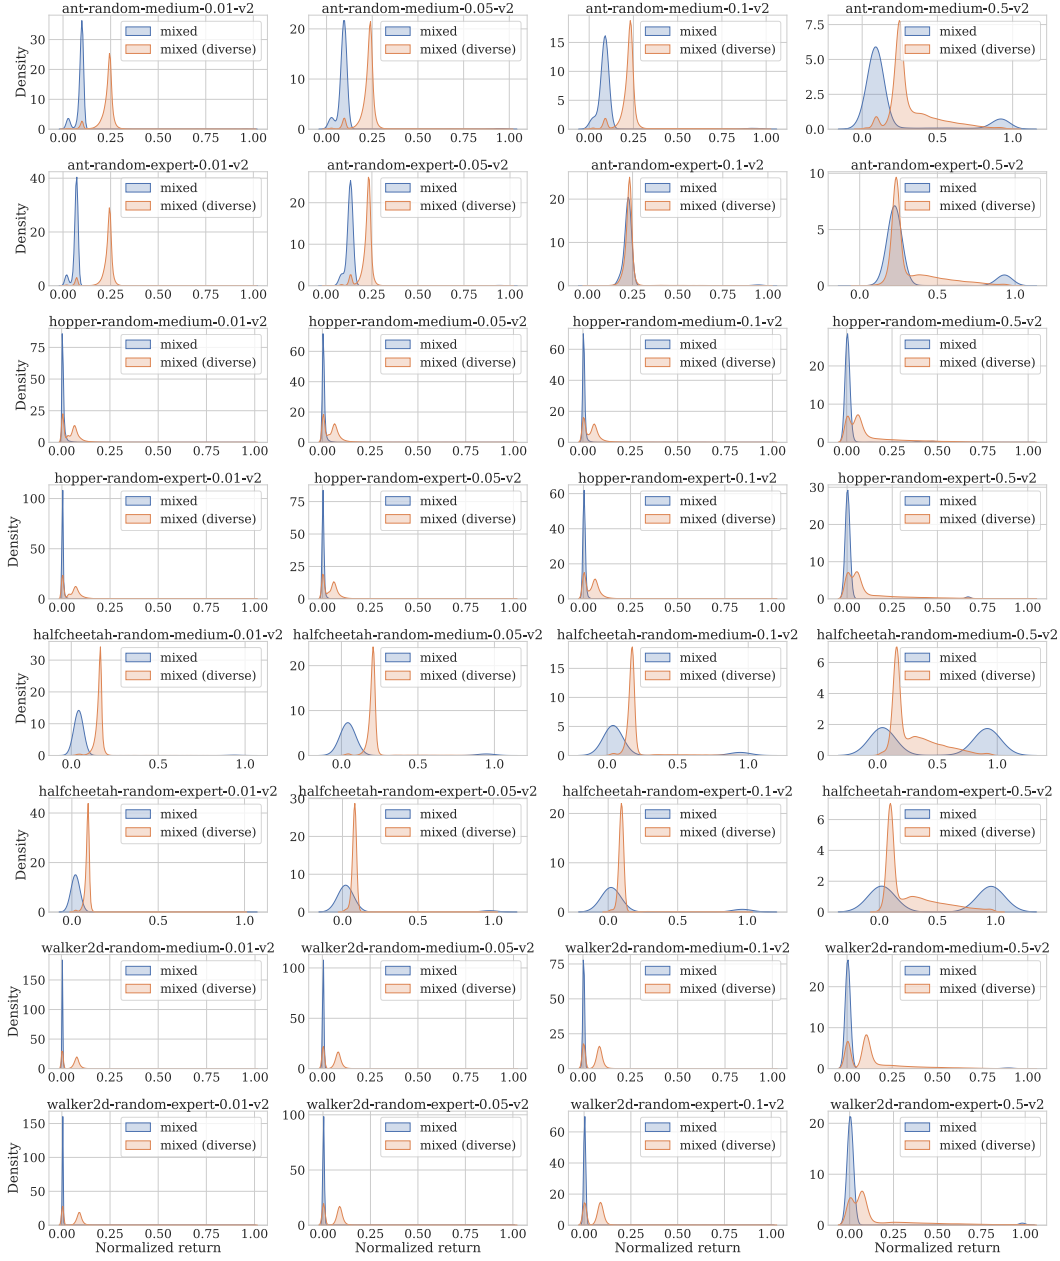

Figure 4: Return distributions of mixed datasets with similar initial states (blue, Scenario (i)) and  
 diverse initial states (orange, Scenario (ii)). Both types of datasets lead to different kinds of imbalance  
 and return distributions. See Section A.3.3 for details.

#### A.4 Additional results

We present the full results in total of 113 datasets in Tables 4 and 5, including original D4RL datasets [7], mixed datasets (Figure 2a, denoted as Mixed), mixed datasets with diverse initial states (Figure 3, denoted as Mixed (diverse)), and small datasets (Figure 2b, denoted as Mixed (small)). As [13] suggested, the original D4RL datasets are not imbalanced and thus weighted sampling and importance weighting methods perform on par with uniform sampling.

##### A.4.1 Comparison with OptDiCE

OptDiCE [27] and AlgaeDiCE [34], as well as our method, all involve learning importance weights for policy optimization. However, the usage and learning of importance weights vary across these methods. We compare our method with OptDiCE as it is the state-of-the-art method on policy optimization using DiCE. In the following, we illustrate the difference between our method and OptDiCE.

**Learning importance weights.** OptDiCE learns the importance weights through solving the optimization problem same as Equation 10 in an approach different from ours. OptDiCE learns the importance weights through optimizing the following primal-dual objective:

$$\min_{\nu} \max_{w \geq 0} \mathbb{E}_{(s,a) \sim \mathcal{D}} [e_{\nu}(s,a)w(s,a) - \alpha f(w(s,a))] + (1 - \gamma) \mathbb{E}_{s_0 \sim p_0} [\nu(s_0)] \approx \quad (30)$$

$$\min_{\nu} \mathbb{E}_{(s,a,s') \sim \mathcal{D}} [\hat{e}_{\nu}(s,a,s')(f')^{-1}(\frac{1}{\alpha} \hat{e}_{\nu}(s,a,s'))_+ - \alpha f((f')^{-1}(\frac{1}{\alpha} \hat{e}_{\nu}(s,a,s'))_+)] + \quad (31)$$

$$(1 - \gamma) \mathbb{E}_{s_0 \sim p_0} [\nu(s_0)],$$

where  $f$  can be any convex function (e.g.,  $f(x) := x \log x$ ),  $\hat{e}_{\nu}(s,a,s') := r(s,a) + \gamma \nu(s') - \nu(s)$ , and  $x_+ := \max(0, x)$ . The coefficient  $\alpha$  denotes the strength of regularization: the higher the  $\alpha$  is, the uniform the importance weights are. The learned importance weights  $w(s,a)$  are expressed in terms of  $\nu$  as follows:

$$w(s,a) = \max \left( 0, (f')^{-1} \left( \frac{\hat{e}_{\nu}(s,a,s')}{\alpha} \right) \right). \quad (32)$$

On the other hand, our method learns the importance weights without solving the min-max optimization.

**Applying importance weights.** OptDiCE extracts the policy from the learned importance weights using information projection (I-projection) [27]. The implementation of I-projection is non-trivial, while its idea is close to weighted behavior cloning objective shown as follows:

$$\max_{\pi} \mathbb{E}_{(s,a) \sim \mathcal{D}_w} [\log \pi(a|s)] = \max_{\pi} \mathbb{E}_{(s,a) \sim \mathcal{D}} [w(s,a) \log \pi(a|s)]. \quad (33)$$

Differing from OptDiCE, we apply the importance weights to actor-critic offline RL algorithms like CQL [22] and IQL [19].

We present the performance of our methods in CQL and IQL, and OptDiCE in imbalanced datasets used in Scenario (i) in Figure 5, showing that OptDiCE underperform all the other methods on imbalanced datasets and even underperforms uniform sampling approach. This result indicates that even though OptDiCE learns the importance weights by solving a similar objective with our method, OptDiCE is not effective on imbalanced datasets.

##### A.4.2 Comparison with weights learned by OptDiCE

While the policy learned using OptDiCE may not be effective on imbalanced datasets, it remains uncertain whether the importance weights learned with OptDiCE can enhance the performance of offline RL algorithms. To investigate this hypothesis, we reweight the training objective of CQL (Equation 17) using the importance weights learned with OptDiCE (Equation 32). We present a comparison with our method in Table 1, where OptDiCEW refers to CQL trained with OptDiCE weights, and  $\alpha$  represents the regularization strength (Equation 30). We examine different values of  $\alpha$  ranging from 0.1 to 5.0, but none of them consistently outperforms our method. It is worth noting that each configuration results in a significant performance loss in certain datasets. While this observation suggests that the importance weights learned using OptDiCE are not effective in improving the performance of offline RL algorithms, it is important to note that our work does not



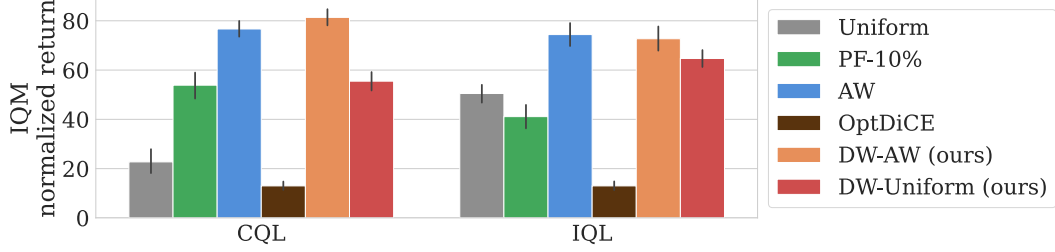

Figure 5: Results on imbalanced datasets of trajectories with similar initial states (Scenario (i) in Section 5.1). OptDiCE [27] fails to achieve high return on imbalanced datasets and even performs worse than CQL and IQL with uniform sampling. Note that OptDiCE is a density-ratio importance correction estimation (DiCE) based offline RL algorithm rather than a sampling or importance weighting method. While both bars of OptDiCE in this figure denote the same result, we plot the performance of OptDiCE alongside CQL and IQL with different sampling (or weighting) methods for comparison.

|                                     | OptDiCEW ( $\alpha = 0.1$ ) | OptDiCEW ( $\alpha = 1.0$ ) | OptDiCEW ( $\alpha = 5.0$ ) |
|-------------------------------------|-----------------------------|-----------------------------|-----------------------------|
| hopper-random-expert-diverse-5%-v2  | 3.3 (-17.5)                 | 39.1 (+18.3)                | 4.0 (-16.8)                 |
| hopper-random-expert-diverse-10%-v2 | 1.5 (-56.4)                 | 29.7 (-28.2)                | 11.9 (-46.0)                |
| hopper-random-medium-diverse-5%-v2  | -*                          | 6.4 (-58.5)                 | 57.3 (-7.6)                 |
| hopper-random-medium-diverse-10%-v2 | 2.2 (-52.9)                 | 30.1 (-25.0)                | 41.0 (-14.1)                |

(\*: training gets terminated due to NaN values)

Table 1: Comparison of the weights learned by our method and that learned by OptDiCE approach. Each cell in the table denotes the mean return obtained by CQL trained with OptDiCE weights and the number in the parenthesis indicates the improvements (i.e.,  $\text{score}_{\text{OptDiCE}} - \text{score}_{\text{Ours}}$ ) over the performance of DW-Uniform reported in Figure 3. It shows that OptDiCE underperforms our method in most datasets (i.e., negative improvements), and is sensitive to the regularization strength parameter  $\alpha$  (see Section A.4.2).

701 aim to propose a new off-policy evaluation method based on DiCE. Therefore, a comprehensive  
702 comparison between different methods for learning importance weights is left for future research  
703 endeavors.

#### 704 A.4.3 Hyperparameter studies

705 In this section, we investigate the hyperparameters of KL regularization strength ( $\lambda_K$ ) and Bellman  
706 flow conservation strength ( $\lambda_F$ ). We present the average returns obtained in four specific imbalanced  
707 datasets in Table 2. These datasets are chosen because they exhibit significant performance differences  
708 between uniform sampling and other methods. Our observations indicate that higher penalties for  
709 flow conservation and lower strengths of KL regularization tend to improve performance in both CQL  
710 and IQL.

#### 711 A.4.4 Comparison of re-weighting both objectives and only regularization objective

712 In theory, the regularization term  $\mathbb{E}_{(s,a) \sim \mathcal{D}} [C(s,a)]$  (Equation 2) is the only component that can  
713 potentially harm performance on imbalanced datasets, as it encourages the policy to imitate the  
714 suboptimal actions that dominate the dataset. However, our findings suggest that reweighting all  
715 the training objectives in offline RL algorithms leads to improved performance. In this section, we  
716 compare the performance of CQL trained with reweighted regularization only (referred to as "Reg.  
717 only") and reweighting all objectives (referred to as "All"). For the "All" approach, we train CQL  
718 using Equation 17. On the other hand, for the "Reg. only" approach, we remove the term  $w_{\phi,\psi}(s,a)$   
719 from the  $\alpha$  training and the term  $w_{\phi}(s)$  from the  $\pi$  training in Equation 17. Table 3 presents the mean  
720 return of both approaches, indicating that "All" exhibits slightly better performance compared to  
721 "Reg. only".

| $(\lambda_K, \lambda_F)$            | (0.2, 0.1) | (0.2, 1.0) | (0.2, 5.0) | (1.0, 0.1) | (1.0, 1.0) | (1.0, 5.0) |
|-------------------------------------|------------|------------|------------|------------|------------|------------|
| hopper-random-expert-diverse-5%-v2  | 20.4       | 13.8       | 22.1       | 9.6        | 7.5        | 7.9        |
| hopper-random-expert-diverse-10%-v2 | 51.7       | 27.8       | 42.1       | 10.9       | 9.8        | 5.3        |
| hopper-random-medium-diverse-5%-v2  | 64.7       | 66.1       | 60.3       | 16.2       | 5.5        | 25.4       |
| hopper-random-medium-diverse-10%-v2 | 55.4       | 58.9       | 65.3       | 3.6        | 7.2        | 7.3        |

(a) CQL

| $(\lambda_K, \lambda_F)$            | (0.2, 0.1) | (0.2, 1.0) | (0.2, 5.0) | (1.0, 0.1) | (1.0, 1.0) | (1.0, 5.0) |
|-------------------------------------|------------|------------|------------|------------|------------|------------|
| hopper-random-expert-diverse-5%-v2  | 14.7       | 56.4       | 54.2       | 16.8       | 68.4       | 75.1       |
| hopper-random-expert-diverse-10%-v2 | 16.2       | 67.8       | 51.0       | 78.5       | 63.0       | 67.5       |
| hopper-random-medium-diverse-5%-v2  | 53.8       | 50.8       | 51.5       | 50.9       | 49.5       | 52.6       |
| hopper-random-medium-diverse-10%-v2 | 43.4       | 48.8       | 53.0       | 42.5       | 53.2       | 50.8       |

(b) IQL

Table 2: Hyperparameter studies of our DW method in (a) CQL and (b) IQL.  $\lambda_K$  and  $\lambda_F$  denote the strength of KL-regularization and Bellman flow conservation penalty, respectively (see Section A.2). Lower KL-regularization strength  $\lambda_F$  and higher flow conservation penalty strength  $\lambda_F$  lead to better performance.

|                                       | Reg. only | All  |
|---------------------------------------|-----------|------|
| hopper-random-expert-diverse-10%-v2   | 57.1      | 64.9 |
| walker2d-random-expert-diverse-10%-v2 | 1.4       | 8.2  |

Table 3: Reweighting all terms in Equation 17 shows better performance than reweighting only the regularization term. See Section A.4.4.



|                 |                                          | Uniform | AW    | PF    | DW+AW (ours) | DW+Uniform (ours) |
|-----------------|------------------------------------------|---------|-------|-------|--------------|-------------------|
| D4RL MuJoCo     | hopper-random-v2                         | 9.0     | 7.7   | 7.5   | 5.8          | 9.5               |
|                 | hopper-medium-expert-v2                  | 97.2    | 103.7 | 105.7 | 104.7        | 86.9              |
|                 | hopper-medium-replay-v2                  | 85.5    | 95.8  | 90.4  | 97.2         | 86.0              |
|                 | hopper-full-replay-v2                    | 100.4   | 101.2 | 101.5 | 101.4        | 99.7              |
|                 | hopper-medium-v2                         | 61.8    | 67.5  | 65.0  | 65.2         | 66.1              |
|                 | hopper-expert-v2                         | 107.0   | 108.2 | 107.0 | 106.7        | 105.4             |
|                 | halfcheetah-random-v2                    | 21.0    | 15.6  | 2.7   | 10.9         | 12.0              |
|                 | halfcheetah-medium-expert-v2             | 71.2    | 87.4  | 72.1  | 88.8         | 86.1              |
|                 | halfcheetah-medium-replay-v2             | 45.3    | 44.7  | 42.1  | 44.3         | 45.0              |
|                 | halfcheetah-full-replay-v2               | 75.1    | 76.7  | 75.1  | 78.3         | 77.0              |
|                 | halfcheetah-medium-v2                    | 46.5    | 46.5  | 45.4  | 46.6         | 46.5              |
|                 | halfcheetah-expert-v2                    | 81.0    | 87.6  | 60.9  | 20.7         | 44.7              |
|                 | ant-random-v2                            | 7.5     | 7.7   | 6.8   | 29.4         | 32.4              |
|                 | ant-medium-expert-v2                     | 127.4   | 128.7 | 127.5 | 129.8        | 118.1             |
|                 | ant-medium-replay-v2                     | 96.0    | 88.6  | 80.7  | 84.9         | 95.0              |
|                 | ant-full-replay-v2                       | 128.4   | 124.5 | 125.3 | 127.5        | 128.6             |
|                 | ant-medium-v2                            | 100.0   | 92.3  | 92.1  | 91.9         | 97.9              |
|                 | ant-expert-v2                            | 124.5   | 131.4 | 127.0 | 127.2        | 127.6             |
|                 | walker2d-random-v2                       | 6.0     | 4.5   | 11.1  | 7.6          | 8.6               |
|                 | walker2d-medium-expert-v2                | 109.6   | 109.3 | 108.5 | 109.4        | 109.7             |
|                 | walker2d-medium-replay-v2                | 74.3    | 78.1  | 69.9  | 77.8         | 74.4              |
|                 | walker2d-full-replay-v2                  | 90.9    | 88.5  | 88.1  | 92.4         | 90.8              |
|                 | walker2d-medium-v2                       | 82.1    | 81.3  | 77.8  | 81.7         | 82.1              |
|                 | walker2d-expert-v2                       | 108.8   | 108.5 | 108.8 | 108.8        | 108.1             |
| D4RL Antmaze    | antmaze-umaze-v0                         | 73.7    | 77.3  | 56.3  | 76.7         | 71.0              |
|                 | antmaze-umaze-diverse-v0                 | 48.0    | 36.0  | 23.4  | 33.7         | 34.0              |
|                 | antmaze-medium-diverse-v0                | 0.0     | 6.0   | 0.0   | 5.3          | 3.1               |
|                 | antmaze-medium-play-v0                   | 2.2     | 10.7  | 0.0   | 8.7          | 1.3               |
|                 | antmaze-large-diverse-v0                 | 0.0     | 2.0   | 2.7   | 1.3          | 1.7               |
|                 | antmaze-large-play-v0                    | 0.4     | 0.7   | 0.0   | 0.3          | 0.0               |
| D4RL Kitchen    | kitchen-complete-v0                      | 24.2    | 30.2  | 6.4   | 9.5          | 16.5              |
|                 | kitchen-partial-v0                       | 38.4    | 36.0  | 39.9  | 54.0         | 30.0              |
|                 | kitchen-mixed-v0                         | 30.4    | 50.5  | 48.1  | 47.5         | 43.8              |
| D4RL Adroit     | pen-human-v1                             | 1.6     | -3.6  | -0.2  | -7.4         | 28.5              |
|                 | pen-cloned-v1                            | -1.3    | -2.5  | 8.6   | -4.2         | 9.1               |
|                 | hammer-human-v1                          | -7.0    | -7.0  | -6.9  | -7.0         | -7.0              |
|                 | hammer-cloned-v1                         | -7.0    | -7.0  | -7.0  | -6.9         | -6.9              |
|                 | door-human-v1                            | -9.4    | -9.4  | -5.1  | -9.4         | -9.4              |
|                 | door-cloned-v1                           | -9.4    | -9.4  | 21.6  | -9.4         | -9.4              |
| Mixed           | relocate-human-v1                        | 1.1     | -2.1  | -0.8  | -2.1         | -2.1              |
|                 | relocate-cloned-v1                       | -2.3    | -2.4  | 0.2   | -2.1         | -2.1              |
|                 | ant-random-medium-1%-v2                  | 33.8    | 73.6  | 5.9   | 70.4         | 61.2              |
|                 | ant-random-medium-5%-v2                  | 53.1    | 86.1  | 72.0  | 86.1         | 87.0              |
|                 | ant-random-medium-10%-v2                 | 81.3    | 88.1  | 92.2  | 86.8         | 86.5              |
|                 | ant-random-medium-50%-v2                 | 97.4    | 93.3  | 92.0  | 94.0         | 96.1              |
|                 | ant-random-expert-1%-v2                  | 10.0    | 73.1  | 4.2   | 59.7         | 37.9              |
|                 | ant-random-expert-5%-v2                  | 35.2    | 113.8 | 62.9  | 112.2        | 90.7              |
|                 | ant-random-expert-10%-v2                 | 48.3    | 119.6 | 102.7 | 123.1        | 109.1             |
|                 | ant-random-expert-50%-v2                 | 117.3   | 130.4 | 122.4 | 131.3        | 113.7             |
|                 | hopper-random-medium-1%-v2               | 0.6     | 55.1  | 58.2  | 56.0         | 60.1              |
|                 | hopper-random-medium-5%-v2               | 1.5     | 61.4  | 42.6  | 60.3         | 59.4              |
|                 | hopper-random-medium-10%-v2              | 1.6     | 56.3  | 66.4  | 67.0         | 59.9              |
|                 | hopper-random-medium-50%-v2              | 22.9    | 37.2  | 65.5  | 41.3         | 54.3              |
|                 | hopper-random-expert-1%-v2               | 17.5    | 59.6  | 14.7  | 61.7         | 21.3              |
|                 | hopper-random-expert-5%-v2               | 13.7    | 99.7  | 31.8  | 104.2        | 52.0              |
|                 | hopper-random-expert-10%-v2              | 14.9    | 99.8  | 36.8  | 107.9        | 51.9              |
|                 | hopper-random-expert-50%-v2              | 100.6   | 108.9 | 105.4 | 104.4        | 83.3              |
|                 | halfcheetah-random-medium-1%-v2          | 37.1    | 39.8  | 18.1  | 38.4         | 36.6              |
|                 | halfcheetah-random-medium-5%-v2          | 41.1    | 45.4  | 42.3  | 45.3         | 43.9              |
|                 | halfcheetah-random-medium-10%-v2         | 44.6    | 45.8  | 44.9  | 45.7         | 41.9              |
|                 | halfcheetah-random-medium-50%-v2         | 46.6    | 46.5  | 44.9  | 46.5         | 46.2              |
|                 | halfcheetah-random-expert-1%-v2          | 21.3    | 21.7  | 4.7   | 13.5         | 14.5              |
|                 | halfcheetah-random-expert-5%-v2          | 24.8    | 62.2  | 7.4   | 67.5         | 17.6              |
|                 | halfcheetah-random-expert-10%-v2         | 30.9    | 71.0  | 70.3  | 74.0         | 27.1              |
|                 | halfcheetah-random-expert-50%-v2         | 58.7    | 80.7  | 55.1  | 83.4         | 37.8              |
| Mixed (diverse) | walker2d-random-medium-1%-v2             | 2.9     | 40.9  | 2.3   | 47.1         | 0.6               |
|                 | walker2d-random-medium-5%-v2             | 0.0     | 74.2  | 44.6  | 74.2         | 9.9               |
|                 | walker2d-random-medium-10%-v2            | 0.6     | 74.6  | 73.5  | 78.7         | 58.8              |
|                 | walker2d-random-medium-50%-v2            | 76.9    | 81.7  | 81.2  | 80.8         | 78.0              |
|                 | walker2d-random-expert-1%-v2             | 4.0     | 64.6  | 3.0   | 83.4         | -0.1              |
|                 | walker2d-random-expert-5%-v2             | 0.2     | 107.6 | 32.7  | 106.9        | 12.2              |
|                 | walker2d-random-expert-10%-v2            | 3.1     | 108.1 | 17.0  | 108.3        | 0.8               |
|                 | walker2d-random-expert-50%-v2            | 0.3     | 108.5 | 108.1 | 108.7        | 92.5              |
|                 | ant-random-medium-diverse-1%-v2          | 9.6     | 20.7  | 5.9   | 67.4         | 29.3              |
|                 | ant-random-medium-diverse-5%-v2          | 53.3    | 84.2  | 39.5  | 82.0         | 72.4              |
|                 | ant-random-medium-diverse-10%-v2         | 78.0    | 88.2  | 92.7  | 91.8         | 87.6              |
|                 | ant-random-medium-diverse-50%-v2         | 101.9   | 91.3  | 92.5  | 94.6         | 100.5             |
|                 | ant-random-expert-diverse-1%-v2          | 7.5     | 9.5   | 6.2   | 27.6         | 9.8               |
|                 | ant-random-expert-diverse-5%-v2          | 12.7    | 29.1  | 7.6   | 96.1         | 54.4              |
|                 | ant-random-expert-diverse-10%-v2         | 23.4    | 75.3  | 57.3  | 109.6        | 84.7              |
|                 | ant-random-expert-diverse-50%-v2         | 112.5   | 116.1 | 121.3 | 123.7        | 121.1             |
|                 | hopper-random-medium-diverse-1%-v2       | 3.1     | 13.8  | 50.7  | 55.7         | 9.5               |
|                 | hopper-random-medium-diverse-5%-v2       | 19.0    | 24.2  | 55.5  | 61.9         | 66.4              |
|                 | hopper-random-medium-diverse-10%-v2      | 5.8     | 4.3   | 35.9  | 61.1         | 54.2              |
|                 | hopper-random-medium-diverse-50%-v2      | 31.8    | 56.0  | 58.5  | 58.2         | 59.6              |
|                 | hopper-random-expert-diverse-1%-v2       | 10.2    | 13.7  | 3.0   | 16.3         | 2.3               |
|                 | hopper-random-expert-diverse-5%-v2       | 5.2     | 10.0  | 27.6  | 44.4         | 20.2              |
|                 | hopper-random-expert-diverse-10%-v2      | 5.4     | 58.4  | 24.5  | 54.5         | 64.9              |
|                 | hopper-random-expert-diverse-50%-v2      | 96.1    | 100.4 | 81.0  | 102.6        | 96.7              |
| Mixed (small)   | halfcheetah-random-medium-diverse-1%-v2  | 39.6    | 41.0  | 32.2  | 22.0         | 40.4              |
|                 | halfcheetah-random-medium-diverse-5%-v2  | 44.5    | 44.1  | 44.6  | 34.8         | 44.6              |
|                 | halfcheetah-random-medium-diverse-10%-v2 | 43.7    | 45.3  | 44.7  | 42.7         | 45.5              |
|                 | halfcheetah-random-medium-diverse-50%-v2 | 46.8    | 46.8  | 45.7  | 43.4         | 46.4              |
|                 | halfcheetah-random-expert-diverse-1%-v2  | 11.8    | 22.0  | 7.5   | 2.5          | 16.3              |
|                 | halfcheetah-random-expert-diverse-5%-v2  | 29.4    | 35.4  | 10.0  | 6.1          | 24.5              |
|                 | halfcheetah-random-expert-diverse-10%-v2 | 24.1    | 39.5  | 16.6  | 10.9         | 16.2              |
|                 | halfcheetah-random-expert-diverse-50%-v2 | 53.3    | 69.1  | 7.1   | 41.4         | 63.9              |
|                 | walker2d-random-medium-diverse-1%-v2     | 1.9     | 1.3   | 26.8  | 1.0          | 1.1               |
|                 | walker2d-random-medium-diverse-5%-v2     | 0.5     | 4.6   | 37.2  | 38.6         | 1.0               |
|                 | walker2d-random-medium-diverse-10%-v2    | 0.3     | 16.2  | 55.5  | 71.6         | 35.5              |
|                 | walker2d-random-medium-diverse-50%-v2    | 76.8    | 79.5  | 77.4  | 75.0         | 78.4              |
|                 | walker2d-random-expert-diverse-1%-v2     | 12.3    | 5.0   | -0.1  | 5.3          | 3.5               |
|                 | walker2d-random-expert-diverse-5%-v2     | 0.6     | 2.0   | 61.8  | 0.1          | 0.7               |
|                 | walker2d-random-expert-diverse-10%-v2    | 1.7     | 1.6   | 49.9  | 0.3          | 8.2               |
|                 | walker2d-random-expert-diverse-50%-v2    | 7.2     | 0.9   | 67.4  | 89.4         | 106.2             |
|                 | ant-random-medium-10%-small-v2           | 5.9     | 29.9  | 6.4   | 17.6         | 25.1              |
|                 | ant-random-expert-10%-small-v2           | 5.9     | 34.9  | 5.3   | 10.4         | 12.1              |
|                 | hopper-random-medium-10%-small-v2        | 39.7    | 3.4   | 44.6  | 50.7         | 49.7              |
|                 | hopper-random-expert-10%-small-v2        | 20.4    | 6.9   | 17.9  | 47.8         | 43.2              |
|                 | halfcheetah-random-medium-10%-small-v2   | 10.2    | 24.6  | 28.3  | 24.4         | 19.7              |
|                 | halfcheetah-random-expert-10%-small-v2   | 2.1     | 3.5   | 2.2   | 4.3          | 3.5               |
|                 | walker2d-random-medium-10%-small-v2      | 1.6     | 0.2   | 0.4   | 34.6         | 31.2              |
|                 | walker2d-random-expert-10%-small-v2      | 13.6    | -0.0  | 0.1   | 24.4         | 44.2              |

Table 4: Full results of average returns of CQL in total of 113 datasets.

|                 |                                          | Uniform | AW    | PF    | DW+AW (ours) | DW+Uniform (ours) |
|-----------------|------------------------------------------|---------|-------|-------|--------------|-------------------|
| D4RL MuJoCo     | hopper-random-v2                         | 7.6     | 6.8   | 8.0   | 6.4          | 8.5               |
|                 | hopper-medium-expert-v2                  | 85.4    | 111.1 | 111.8 | 110.8        | 81.0              |
|                 | hopper-medium-replay-v2                  | 86.7    | 98.1  | 96.0  | 99.9         | 79.7              |
|                 | hopper-full-replay-v2                    | 108.1   | 102.1 | 88.2  | 107.5        | 99.8              |
|                 | hopper-medium-v2                         | 65.7    | 58.3  | 64.5  | 61.7         | 62.5              |
|                 | hopper-expert-v2                         | 109.7   | 111.0 | 110.3 | 105.7        | 108.2             |
|                 | halfcheetah-random-v2                    | 12.7    | 7.3   | 4.2   | 10.7         | 10.8              |
|                 | halfcheetah-medium-expert-v2             | 90.6    | 94.7  | 94.2  | 93.9         | 93.7              |
|                 | halfcheetah-medium-replay-v2             | 44.0    | 44.0  | 29.4  | 44.1         | 44.6              |
|                 | halfcheetah-full-replay-v2               | 73.5    | 76.3  | 72.3  | 76.4         | 75.9              |
|                 | halfcheetah-medium-v2                    | 47.5    | 47.8  | 45.4  | 47.9         | 47.7              |
|                 | halfcheetah-expert-v2                    | 94.9    | 95.3  | 73.8  | 95.2         | 95.1              |
|                 | ant-random-v2                            | 11.9    | 12.2  | 8.3   | 15.8         | 16.3              |
|                 | ant-medium-expert-v2                     | 133.3   | 131.9 | 133.2 | 129.3        | 130.1             |
|                 | ant-medium-replay-v2                     | 93.8    | 82.9  | 71.4  | 86.8         | 89.8              |
|                 | ant-full-replay-v2                       | 130.1   | 129.9 | 128.9 | 131.4        | 130.2             |
|                 | ant-medium-v2                            | 100.0   | 98.9  | 96.2  | 98.1         | 99.6              |
|                 | ant-expert-v2                            | 126.2   | 131.4 | 119.6 | 128.6        | 127.3             |
|                 | walker2d-random-v2                       | 6.7     | 2.7   | 10.4  | 3.7          | 7.0               |
|                 | walker2d-medium-expert-v2                | 110.1   | 109.7 | 109.8 | 109.8        | 109.7             |
|                 | walker2d-medium-replay-v2                | 61.3    | 47.0  | 42.2  | 62.6         | 65.1              |
|                 | walker2d-full-replay-v2                  | 86.8    | 84.5  | 85.6  | 80.6         | 95.0              |
|                 | walker2d-medium-v2                       | 77.9    | 70.0  | 65.3  | 75.8         | 80.8              |
|                 | walker2d-expert-v2                       | 109.9   | 109.9 | 109.6 | 109.5        | 109.4             |
| D4RL Antmaze    | antmaze-umaze-v0                         | 88.0    | 90.7  | 0.0   | 89.3         | 81.3              |
|                 | antmaze-umaze-diverse-v0                 | 67.3    | 75.3  | 0.0   | 72.0         | 61.0              |
|                 | antmaze-medium-diverse-v0                | 76.0    | 61.3  | 0.0   | 70.0         | 78.7              |
|                 | antmaze-medium-play-v0                   | 72.0    | 22.0  | 0.0   | 30.0         | 64.7              |
|                 | antmaze-large-diverse-v0                 | 36.7    | 23.3  | 0.0   | 20.7         | 40.0              |
|                 | antmaze-large-play-v0                    | 43.3    | 9.3   | 0.0   | 10.0         | 42.0              |
| D4RL Kitchen    | kitchen-complete-v0                      | 62.8    | 26.3  | 10.0  | 19.8         | 60.0              |
|                 | kitchen-partial-v0                       | 47.7    | 73.2  | 72.3  | 66.3         | 57.0              |
|                 | kitchen-mixed-v0                         | 49.8    | 47.8  | 52.2  | 24.3         | 36.7              |
| D4RL Adroit     | pen-human-v1                             | 80.4    | 83.2  | 36.3  | 88.3         | 74.9              |
|                 | pen-cloned-v1                            | 82.9    | 89.2  | 53.8  | 84.4         | 91.5              |
|                 | hammer-human-v1                          | 3.1     | 0.5   | 3.2   | 0.8          | 1.2               |
|                 | hammer-cloned-v1                         | 1.1     | 1.4   | 1.0   | 2.3          | 1.4               |
|                 | door-human-v1                            | 2.5     | 0.6   | 0.1   | 0.0          | 1.4               |
|                 | door-cloned-v1                           | 0.0     | 0.6   | 2.4   | -0.0         | 1.5               |
| Mixed           | relocate-human-v1                        | 0.5     | 0.0   | -0.0  | -0.0         | 0.1               |
|                 | relocate-cloned-v1                       | -0.0    | 0.1   | 0.0   | 0.0          | -0.0              |
|                 | ant-random-medium-1%-v2                  | 17.5    | 56.0  | 5.1   | 58.5         | 55.3              |
|                 | ant-random-medium-5%-v2                  | 68.1    | 83.3  | 15.4  | 87.6         | 89.3              |
|                 | ant-random-medium-10%-v2                 | 82.0    | 88.8  | 40.2  | 91.3         | 88.6              |
|                 | ant-random-medium-50%-v2                 | 93.7    | 101.4 | 96.8  | 94.3         | 98.9              |
|                 | ant-random-expert-1%-v2                  | 13.7    | 28.5  | 5.5   | 31.5         | 43.5              |
|                 | ant-random-expert-5%-v2                  | 36.3    | 100.9 | 5.5   | 95.2         | 105.4             |
|                 | ant-random-expert-10%-v2                 | 73.7    | 126.0 | 14.0  | 125.4        | 115.0             |
|                 | ant-random-expert-50%-v2                 | 122.5   | 128.2 | 127.7 | 130.3        | 125.4             |
|                 | hopper-random-medium-1%-v2               | 52.2    | 56.1  | 42.4  | 56.5         | 51.7              |
|                 | hopper-random-medium-5%-v2               | 59.0    | 57.1  | 63.4  | 46.2         | 59.8              |
|                 | hopper-random-medium-10%-v2              | 63.2    | 57.1  | 65.3  | 63.6         | 62.8              |
|                 | hopper-random-medium-50%-v2              | 50.6    | 56.2  | 57.2  | 61.2         | 61.9              |
|                 | hopper-random-expert-1%-v2               | 11.1    | 74.8  | 16.4  | 64.8         | 22.2              |
|                 | hopper-random-expert-5%-v2               | 22.7    | 111.3 | 24.9  | 110.0        | 22.4              |
|                 | hopper-random-expert-10%-v2              | 46.7    | 111.5 | 33.9  | 110.6        | 64.3              |
|                 | hopper-random-expert-50%-v2              | 88.0    | 111.7 | 92.2  | 109.4        | 105.1             |
|                 | halfcheetah-random-medium-1%-v2          | 31.0    | 13.9  | 3.0   | 22.0         | 7.2               |
|                 | halfcheetah-random-medium-5%-v2          | 39.1    | 41.7  | 25.9  | 42.2         | 11.6              |
|                 | halfcheetah-random-medium-10%-v2         | 40.3    | 43.1  | 45.3  | 45.0         | 45.1              |
|                 | halfcheetah-random-medium-50%-v2         | 45.3    | 47.3  | 43.4  | 47.1         | 46.6              |
|                 | halfcheetah-random-expert-1%-v2          | 4.2     | 3.8   | 2.3   | 2.8          | 3.6               |
|                 | halfcheetah-random-expert-5%-v2          | 9.1     | 74.0  | 4.4   | 48.7         | 55.4              |
|                 | halfcheetah-random-expert-10%-v2         | 17.0    | 91.3  | 81.5  | 87.1         | 70.6              |
|                 | halfcheetah-random-expert-50%-v2         | 83.7    | 94.8  | 32.0  | 94.4         | 93.8              |
| Mixed (diverse) | walker2d-random-medium-1%-v2             | 54.6    | 45.4  | 39.4  | 49.4         | 61.8              |
|                 | walker2d-random-medium-5%-v2             | 66.2    | 62.8  | 47.3  | 67.8         | 67.9              |
|                 | walker2d-random-medium-10%-v2            | 63.4    | 65.8  | 62.6  | 62.8         | 74.3              |
|                 | walker2d-random-medium-50%-v2            | 70.7    | 70.0  | 69.6  | 75.6         | 74.1              |
|                 | walker2d-random-expert-1%-v2             | 20.0    | 9.6   | 11.4  | 9.8          | 35.9              |
|                 | walker2d-random-expert-5%-v2             | 25.3    | 108.6 | 93.5  | 104.3        | 65.0              |
|                 | walker2d-random-expert-10%-v2            | 64.4    | 109.3 | 107.2 | 109.1        | 58.1              |
|                 | walker2d-random-expert-50%-v2            | 109.2   | 109.4 | 109.6 | 109.3        | 109.4             |
|                 | ant-random-medium-diverse-1%-v2          | 12.6    | 29.4  | 11.7  | 40.8         | 24.1              |
|                 | ant-random-medium-diverse-5%-v2          | 29.1    | 83.7  | 24.8  | 88.1         | 73.3              |
|                 | ant-random-medium-diverse-10%-v2         | 61.0    | 91.8  | 54.6  | 89.3         | 89.3              |
|                 | ant-random-medium-diverse-50%-v2         | 91.2    | 98.0  | 89.0  | 97.0         | 96.8              |
|                 | ant-random-expert-diverse-1%-v2          | 12.4    | 20.0  | 10.1  | 30.4         | 20.7              |
|                 | ant-random-expert-diverse-5%-v2          | 17.1    | 77.4  | 10.9  | 86.2         | 71.5              |
|                 | ant-random-expert-diverse-10%-v2         | 27.9    | 101.1 | 22.9  | 100.5        | 93.8              |
|                 | ant-random-expert-diverse-50%-v2         | 101.9   | 123.3 | 122.8 | 127.7        | 126.9             |
|                 | hopper-random-medium-diverse-1%-v2       | 37.0    | 48.2  | 47.4  | 54.9         | 63.0              |
|                 | hopper-random-medium-diverse-5%-v2       | 46.7    | 44.7  | 49.3  | 48.6         | 49.0              |
|                 | hopper-random-medium-diverse-10%-v2      | 47.6    | 47.8  | 47.2  | 51.9         | 53.2              |
|                 | hopper-random-medium-diverse-50%-v2      | 51.2    | 48.7  | 53.6  | 54.6         | 52.1              |
|                 | hopper-random-expert-diverse-1%-v2       | 10.5    | 14.6  | 6.5   | 22.3         | 17.4              |
|                 | hopper-random-expert-diverse-5%-v2       | 17.1    | 59.0  | 31.4  | 78.7         | 41.0              |
|                 | hopper-random-expert-diverse-10%-v2      | 33.7    | 92.2  | 52.3  | 103.1        | 63.0              |
|                 | hopper-random-expert-diverse-50%-v2      | 90.1    | 106.8 | 22.7  | 98.9         | 109.4             |
|                 | halfcheetah-random-medium-diverse-1%-v2  | 14.4    | 2.7   | 8.0   | 2.2          | 14.4              |
|                 | halfcheetah-random-medium-diverse-5%-v2  | 34.9    | 20.1  | 17.1  | 2.3          | 15.2              |
|                 | halfcheetah-random-medium-diverse-10%-v2 | 39.7    | 39.7  | 24.0  | 30.9         | 24.3              |
|                 | halfcheetah-random-medium-diverse-50%-v2 | 44.4    | 22.5  | 46.6  | 8.8          | 35.1              |
| Mixed (small)   | halfcheetah-random-expert-diverse-1%-v2  | 5.6     | 4.5   | 5.7   | 3.2          | 4.6               |
|                 | halfcheetah-random-expert-diverse-5%-v2  | 4.8     | 8.5   | 3.6   | 9.9          | 10.3              |
|                 | halfcheetah-random-expert-diverse-10%-v2 | 9.6     | 16.4  | 4.3   | 13.2         | 28.0              |
|                 | halfcheetah-random-expert-diverse-50%-v2 | 66.4    | 70.7  | -0.9  | 72.9         | 83.0              |
|                 | walker2d-random-medium-diverse-1%-v2     | 36.0    | 33.3  | 14.6  | 61.3         | 59.8              |
|                 | walker2d-random-medium-diverse-5%-v2     | 67.5    | 61.7  | 64.8  | 67.9         | 55.3              |
|                 | walker2d-random-medium-diverse-10%-v2    | 58.8    | 58.9  | 59.2  | 66.2         | 60.5              |
|                 | walker2d-random-medium-diverse-50%-v2    | 66.8    | 49.4  | 74.6  | 63.7         | 64.0              |
|                 | walker2d-random-expert-diverse-1%-v2     | 10.5    | 13.0  | 1.6   | 31.0         | 26.4              |
|                 | walker2d-random-expert-diverse-5%-v2     | 19.2    | 33.1  | 7.7   | 66.4         | 76.4              |
|                 | walker2d-random-expert-diverse-10%-v2    | 49.9    | 61.2  | 8.5   | 73.1         | 86.4              |
|                 | walker2d-random-expert-diverse-50%-v2    | 64.1    | 108.8 | 15.3  | 108.1        | 108.6             |
|                 | ant-random-medium-10%-small-v2           | 8.5     | 53.2  | 4.5   | 52.7         | 21.7              |
|                 | ant-random-expert-10%-small-v2           | 8.1     | 27.8  | 4.0   | 24.0         | 13.9              |
|                 | hopper-random-medium-10%-small-v2        | 11.0    | 51.7  | 9.5   | 49.5         | 39.0              |
|                 | hopper-random-expert-10%-small-v2        | 3.5     | 20.6  | 4.0   | 29.9         | 8.0               |
|                 | halfcheetah-random-medium-10%-small-v2   | 3.7     | 15.0  | 22.6  | 14.6         | 7.3               |
|                 | halfcheetah-random-expert-10%-small-v2   | 2.4     | 3.1   | -1.9  | 3.2          | 2.2               |
|                 | walker2d-random-medium-10%-small-v2      | 1.6     | 24.1  | 0.3   | 37.6         | 8.4               |
|                 | walker2d-random-expert-10%-small-v2      | 0.5     | 2.8   | 0.2   | 4.8          | 1.7               |

Table 5: Full results of average returns of IQL in total of 113 datasets.
